# Supplementary material for: RSV Surge in the USA and Viral Lineages, 2022
Source: PubMed Central journal article supplement (PMC10081154; doi:10.1056/nejmc2216153), 2023-02-22
Supplement: NIHMS1875506-supplement-supplement.pdf [file NIHMS1875506-supplement-supplement.pdf]

1 **Supplementary Appendix**

2  
3  
4  
5  
6  
7  
8  
9  
10  
11  
12  
13  
14  
15  
16  
17  
18  
19  
20  
21  
22  
23  
24  
25

**Contents**

Description of the Cohort.....2 - 3

Supplemental Methods.....3 –9

Use of Data.....9

Ethical Statement.....9

Supplemental Figure S1.....10

Supplemental Figure S2.....11

Supplemental Figure S3.....12

Supplemental Figure S4.....13

Supplemental Figure S5.....14

Supplemental Table S1..... 15 - 17

References.....18 - 19

## 26 **Description of the cohort**

27 In autumn 2022, MGH reported a surge in RSV cases, with a total of 950 RSV-positive samples  
28 from Sept 1 – Nov 17 (**Supplemental Table 1**). In the MGH dataset, the number of positive RSV  
29 cases peaked the week of October 29, 2022, much earlier than previous years, and subsequently  
30 fell, mirroring trends that occurred at the state (**Figure 1A**), national (Pearson's correlation  
31 coefficient = 0.82,  $p < 0.0001$ ; **Figure 1AB**)<sup>1</sup>, and global levels<sup>2</sup>.

32 The 77 patients from whom near-complete and partial RSV genomes were obtained consisted of  
33 44% ( $n = 34$ ) males with a median age of 2 years, and with 18% ( $n = 14$ ) collected in inpatient  
34 care, 43% ( $n = 33$ ) collected in outpatient care, and 39% ( $n = 30$ ) collected in the emergency  
35 department (**Supplemental Table 1B**). All 77 patients reported symptoms consistent with a  
36 respiratory infection (**Supplemental Table 1B**). This cohort was representative of the greater  
37 MGH RSV-positive patient cohort with respect to multiple demographic criteria, including sex ( $p$   
38 = 0.12, chi-square test), age ( $p = 0.25$ , Wilcoxon rank sum test), presenting hospital unit ( $p = 0.07$ ,  
39 chi-square test), and presence of symptoms ( $p = 1$ , chi-square test) (**Supplemental Table 1A**  
40 **and B**). The MGH cohorts are also consistent with the national RSV hospitalization data<sup>1</sup> with  
41 respect to sex ( $p > 0.05$ , chi-square tests; **Supplemental Table 1C**) though they are slightly older  
42 than the national hospitalized cohort (median age 2 at MGH vs.  $< 1$  nationally,  $p < 0.0001$ ,  
43 **Supplemental Figure 1**). Our study ( $N = 77$ ) was not powered to investigate associations  
44 between RSV genotype and clinical symptoms or outcomes (e.g., hospitalization or need for  
45 respiratory support). More broadly, the relationship between RSV subtype and clinical severity  
46 remains unclear<sup>3-6</sup>.

47 We identified ten instances of co-infection with RSV and another known respiratory virus (9/105  
48 rhinovirus or enterovirus, 1/105 metapneumovirus virus). We did not detect the presence of other  
49 common respiratory viruses (**Supplemental Figure 3**).

50 Genomic distances between samples ranged from 2 to 273 mutations for RSV-A, and 3 to 70  
51 mutations for RSV-B, with a mean pairwise distance of 181 and 36 mutations respectively. We  
52 identified a single pair of near-complete genomes identical at the consensus-level, suggestive of  
53 a transmission link between these cases.

## 54 **Methods**

### 55 ***Description of samples and associated clinical data***

56 For genomic analysis, we obtained 105 frozen (-80°C), archived, de-identified, residual  
57 diagnostic upper respiratory tract samples that were positive for RSV based on clinical  
58 diagnostic testing from the MGH Clinical Microbiology Laboratory, from individuals presenting  
59 with respiratory symptoms to MGH and its affiliated outpatient practices collected between  
60 November 2 – 15. Clinical diagnostic testing for the presence of viral respiratory pathogens was  
61 performed using one of three clinically verified, Food and Drug Administration (FDA) emergency  
62 use authorized or approved assays: the Xpert Xpress SARS-CoV-2/Flu/RSV (Cepheid,  
63 Sunnyvale, CA; either the original or plus assay; 90/105 samples) or the BioFire Respiratory  
64 2.1 Panel (BioFire Diagnostics, Salt Lake City, UT; 15/105 samples). The Xpert Xpress SARS-  
65 CoV-2/FLU/RSV assays contain targets for the detection of SARS-CoV-2, influenza A and B,  
66 and RSV. The BioFire Respiratory 2.1 Panel contains targets for the following viruses: SARS-  
67 CoV-2, non-SARS-CoV-2 coronaviruses, human rhinovirus/enterovirus (combined target),  
68 influenza A and B, RSV, parainfluenza viruses 1-4, adenovirus, and human metapneumovirus.

69 For the full MGH RSV-positive cohort (N = 950), decisions regarding which assay was used for  
70 viral testing were based on MGH testing policy recommendations specific to the outpatient or  
71 emergency department (ED) and inpatient (IP) settings. For outpatients, from July 11, 2022 to  
72 October 18, 2022, testing using the Cepheid Xpress SARS-CoV-2/Flu/RSV or SARS-CoV-

73 2/Flu/RSV plus was recommended for symptomatic patients with risk factors for severe disease  
74 or complications from RSV (children < 3 years old, immunocompromised patients, or those with  
75 chronic lung disease). Routine testing for influenza was discouraged during this time due to low  
76 influenza prevalence based on surveillance data but was automatically performed (along with  
77 testing for SARS-CoV-2) when RSV testing was requested as these viral targets are included in  
78 the Cepheid assays. On October 18, 2022, based on guidance from the Centers for Disease  
79 Control and Prevention (CDC)<sup>7</sup> as well as an increase in influenza cases in Massachusetts,  
80 outpatient respiratory viral testing recommendations were changed to highlight appropriate  
81 indications for influenza testing, and the Cepheid assays were again used for symptomatic  
82 patients with risk factors for severe disease or complications from influenza<sup>7</sup>. RSV and SARS-  
83 CoV-2 testing were automatically performed when influenza testing was requested given the  
84 targets present in the Cepheid assays. The Cepheid assays were still the diagnostics of choice  
85 when RSV was clinically suspected. However, there was no requirement or verification that  
86 patients must meet these recommendations for testing. Expanded respiratory viral testing using  
87 the BioFire Respiratory 2.1 Panel was only available in the outpatient setting after approval by  
88 the MGH Clinical Microbiology Laboratory. For ED and IP testing, all respiratory viral testing was  
89 performed using the Pandemic Respiratory Order (PRO) set, which is a clinical decision support  
90 tool that uses provider responses to a series of predefined questions targeting clinical and  
91 operational indications for respiratory virus testing; the ordering clinician does not choose the  
92 assay used. Decision support rules were developed and maintained by experts in infectious  
93 diseases, infection control, and laboratory medicine based on national guidelines (e.g., the  
94 Infectious Diseases Society of America<sup>8</sup>) and operational considerations (e.g., discharge  
95 disposition), with input from other stakeholders. In general, testing using the Cepheid assays  
96 was performed on all adult immunocompetent patients presenting with symptoms consistent  
97 with COVID-19 as well as immunocompetent pediatric patients presenting to the ED with  
98 symptoms consistent with COVID-19 with a high likelihood of discharge home.

99 Immunocompromised patients (pediatric and adult) and immunocompetent pediatric patients  
100 presenting to the ED with symptoms consistent with COVID-19 with a high likelihood of hospital  
101 admission were tested using the BioFire Respiratory 2.1 Panel.

102 Patient demographics were extracted from the MGH Microbiology Sunquest Laboratory  
103 database, which collates patient information associated with all diagnostic samples collected at  
104 MGH. Symptom reports were extracted from the Mass General Brigham Enterprise Data  
105 Warehouse, which organizes Epic medical record data into an SQL database.

#### 106 ***Processing and analysis of national data***

107 Weekly 2022 national case counts were downloaded from the CDC<sup>9</sup>, and weekly national  
108 hospitalization rates (with demographic breakdowns by age and sex) were downloaded from the  
109 RSV Hospitalization Surveillance Network (RSV-NET)<sup>1</sup>. We converted hospitalization rates per  
110 100,000 individuals into case counts using demographics from the United States Census<sup>10</sup>.

111 To compare monthly national case counts with MGH's monthly positive test counts, we calculated  
112 the Pearson correlation coefficient after removing months with missing data in either data set. To  
113 determine the significance of this correlation, the monthly national case counts were then  
114 scrambled across dates 10,000 times, generating a null distribution of correlation coefficients  
115 **(Figure 1B)**.

116 The national hospitalization data binned ages (0-6 months, 6-12 months, 1-2 years, 2-5 years, 5-  
117 11 years, 12-17 years, 18-29 years, 30-39 years, 40-49 years, 50-64 years, 65-74 years, 75-84  
118 years, 85+ years). For each case in each age bin, we randomly sampled an age uniformly across  
119 the bin. These sampled ages were compared to the ages of individuals in the MGH cohorts using  
120 the Wilcoxon rank sum test **(Supplemental Figure 1)**.

121 ***Unbiased metagenomic sequencing***

122 To prepare samples for sequencing, we extracted total nucleic acid from upper respiratory tract  
123 samples in transport media, removed DNA with DNase I treatment, and assessed viral quantity  
124 using an RSV-specific SYBR green RT-qPCR assay<sup>11</sup>. Human ribosomal RNA was then depleted  
125 with an RNase-H based method, and libraries were constructed using a strand-specific ligation-  
126 based approach<sup>12</sup>. Briefly, RNA was heat-fragmented and first-strand cDNA was generated with  
127 randomly primed reverse transcription. Second-strand cDNA was generated with nick translation  
128 and labeled with dUTP. Full-length, y-shaped, unique-dual-index Illumina sequencing adapters  
129 containing a UMI adjacent to the i7 index were ligated to the resulting double-stranded DNA.  
130 Samples were then treated with Uracil-Specific Excision Reagent (USER enzyme) to excise dUTP  
131 from the second strand. Libraries were PCR amplified, quantified, and pooled in equimolar ratios  
132 for sequencing on Illumina MiSeq or NextSeq 550 instruments.

133 ***RSV genome assembly and analysis***

134 To assemble RSV genomes, we conducted all analyses using viral-ngs 2.1.28<sup>13</sup> on the Terra  
135 platform ([app.terra.bio](http://app.terra.bio)), available via the Dockstore Tool Registry Service  
136 ([dockstore.org/organizations/BroadInstitute/collections/pgs](http://dockstore.org/organizations/BroadInstitute/collections/pgs)). Briefly, samples were  
137 demultiplexed, reads were filtered for known sequencing contaminants, and de novo assembly  
138 with scaffolding against RSV-A (GenBank: KY654518.1) and RSV-B (GenBank: MZ516105.1)  
139 was performed.

140 The mean unambiguous genome length of these genomes was 11,970 bp for RSV-A and 10,268  
141 bases for RSV-B. Assembled genomes with  $\geq 50\%$  completeness were deposited into NCBI  
142 GenBank (see Supplemental File 1). Raw reads for all samples (including those that did not  
143 produce a successful genome) were deposited in NCBI SRA. All NCBI data were deposited under  
144 BioProject PRJNA904288.

145 ***Phylogenetic analysis***

146 We constructed RSV-A and RSV-B specific maximum-likelihood (ML) phylogenetic trees<sup>14</sup> with  
147 associated visualizations using an augur pipeline<sup>15</sup> (*augur\_from\_assemblies*), part of the  
148 Nextstrain project<sup>16</sup>. We included all contextual genomes from GenBank with reported collection  
149 dates and a genome length greater than 12,160 bp, corresponding to 80% of the reference  
150 genome length (resulting in a total of RSV-A N=1,238; RSV-B N=934 genomes downloaded on  
151 December 6, 2022). Within augur, RSV-A and RSV-B genomes were aligned via MAFFT v.7 to  
152 GenBank NC\_038235.1 and NC\_001781.1, respectively. This alignment was further processed  
153 in both the ML and Bayesian analyses.

154 We used the contextualized ML phylogeny to calculate the number of lineages circulating and  
155 estimate the time to tMRCA. To do so, we assigned a binary trait to each genome in the  
156 phylogeny, associated with the genome division of collection, and used Nextstrain's ancestral  
157 inference to infer the state of that trait for each internal node in the tree. We defined a lineage at  
158 the first node attributed to contain only MA descendants. Using *baltic*<sup>17</sup>, we extracted these  
159 changes from the phylogenetic tree and plotted the inferred tMRCA for each lineage using  
160 *matplotlib*<sup>18</sup>.

161 In parallel, we conducted molecular dating using BEAST version 1.10.5<sup>19</sup>. We used the same  
162 genome length filter (80% of the reference genome) and alignment described in the ML analysis.  
163 However, we used a subset of available genomes, selected as follows: (i) all genomes generated  
164 in 2022 (79 for RSV-A, 14 for RSV-B); (ii) all descendants of the parent node of all 2022 genomes  
165 (4 additional genomes for RSV-A, 0 additional genomes for RSV-B); and (iii) genomes sampled  
166 uniformly across time (221 additional genomes for RSV-A, 290 additional genomes for RSV-B),  
167 to reach a total of 304 genomes each for RSV-A and RSV-B. In BEAUti v.1.10.4, we defined two  
168 taxon sets for which we generated posterior distributions of the tMRCAs: one including all 2022

169 (i.e., MA and WA) genomes and one containing solely the 2022 MA genomes created in this  
170 study. We used dates with variable precision (i.e., retained sequences with missing day or month  
171 resolution) and used the HKY substitution model<sup>20</sup> with 4 categories of gamma site  
172 heterogeneity<sup>21</sup>. We combined a strict clock model with a coalescent tree prior (a piecewise  
173 Bayesian skyline model<sup>22</sup> with 5 groups). We ran BEAST twice, each with a UPGMA starting tree  
174 and 300 million MCMC steps, sampled every 1000 steps. We removed the first 10% of steps as  
175 burn-in and combined the two .log files via LogCombiner v1.10.4. We analyzed results in Tracer  
176 v.1.7.2<sup>23</sup> to ensure convergence, and isolated the molecular clock and tMRCA estimates from the  
177 combined .log file. We also combined the two trees files in LogCombiner v1.10.4, removing the  
178 first 10% as burn-in and sampling every 10,000 trees. We generated the maximum clade  
179 credibility (MCC) tree with median heights using TreeAnnotator v1.10.4<sup>24</sup> and displayed it using  
180 FigTree v1.4.4.

181 Using the molecular clock rate calculated by BEAST, we determined the residuals (number of  
182 mutations) per sample. Samples with a residual falling outside of the 2.5–97.5th percentiles were  
183 considered to statistically deviate from the molecular clock rate.

184 Root-to-tip plots were generated using TempEst<sup>25</sup>.

### 185 ***Coinfection analysis***

186 Among the RSV-positive sequenced samples, one co-infection was detected clinically via the  
187 BioFire Respiratory 2.1 Panel (RSV and rhinovirus/enterovirus). However, the majority of samples  
188 were not clinically assessed for most other co-infections, as the Cepheid assays only target  
189 SARS-CoV-2, influenza, and RSV. To assess for additional coinfections in all samples that  
190 underwent unbiased sequencing, taxonomic classification of reads was performed with Kraken2<sup>26</sup>  
191 using a custom database as previously described<sup>27</sup>. A viral taxon was considered present if >10  
192 reads were assigned to it. We filtered the results to include solely known human respiratory



193 viruses. All Kraken2 classifications were verified by megablast as follows: first, megablast was  
194 run on *de novo* contigs. If the least common ancestor of the top e-value megablast hit agreed with  
195 the Kraken2 classification for at least one contig ( $\geq 200$  bp), we considered the taxon present. If  
196 this criterion was not met, megablast was run on all reads assigned to the taxon of interest by  
197 Kraken2. If the least common ancestor of the top e-value megablast hits agreed with the Kraken2  
198 classification for at least 90% of the assigned reads, the taxon was considered present

### 199 ***Use of data***

200 Raw reads and assembled genomes are submitted to Genbank under PRJNA904288. The data  
201 are available immediately and shared under Genbank's use agreements to facilitate accelerated  
202 public health and scientific investigations. Files associated with the Bayesian analyses are  
203 available on GitHub at <https://github.com/bpetros95/rsv-2022>.

### 204 ***Ethical statement***

205 This study was conducted at the Broad Institute and Massachusetts General Hospital with  
206 approval from the Massachusetts General Brigham Institutional Review Board under Protocol  
207 #2019P003305 and from the MIT Institutional Review Board under Protocol #1612793224. At  
208 MGH, clinical excess samples were collected from the Clinical Microbiology Laboratory, and  
209 associated clinical and demographic data were extracted from the electronic medical record and  
210 clinical laboratory information management systems under a waiver of consent.

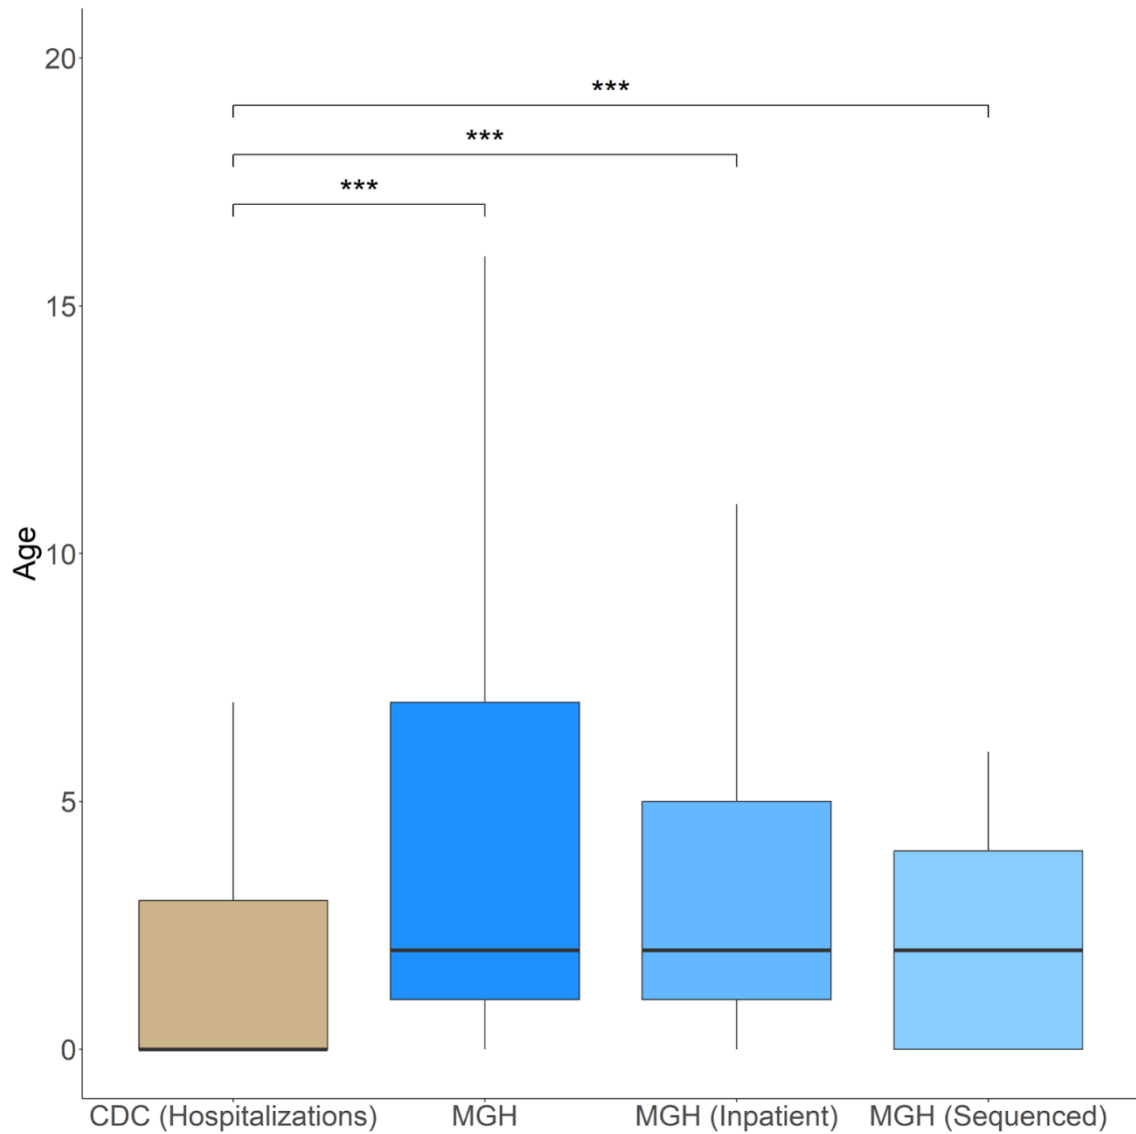

211

212

213

214

215

**Supplemental Figure S1: Age of individuals in the national and MGH data sets.** Median ages, < 1 year (CDC hospitalization data), 2 (MGH patients, N = 950), 2 (MGH hospitalized patients, N = 212), and 2 (MGH sequenced cohort, N = 77). \*\*\*, p < 0.0001 via Wilcoxon rank sum test.

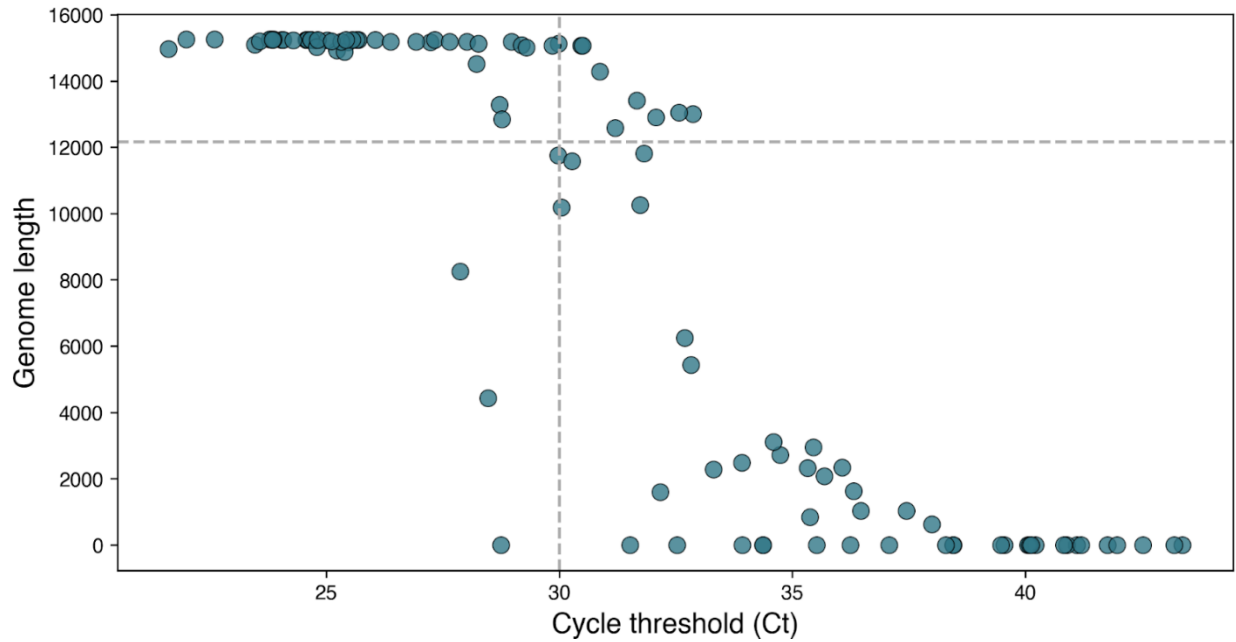

216

217 **Supplemental Figure S2: Unambiguous genome length vs. cycle threshold (Ct).** Each dot  
 218 represents a unique sample in our dataset. Dashed lines are at a Ct of 30, and an unambiguous  
 219 genome length of 12160, corresponding to ~80% of the RSV genome. Of the 105 samples, 92%  
 220 (46/50) with a RT-qPCR Ct value  $\leq 30$  resulted in a genome, whereas only 15% (8/55) with a Ct  
 221  $> 30$  resulted in a genome.

### Respiratory viruses detected in patient samples

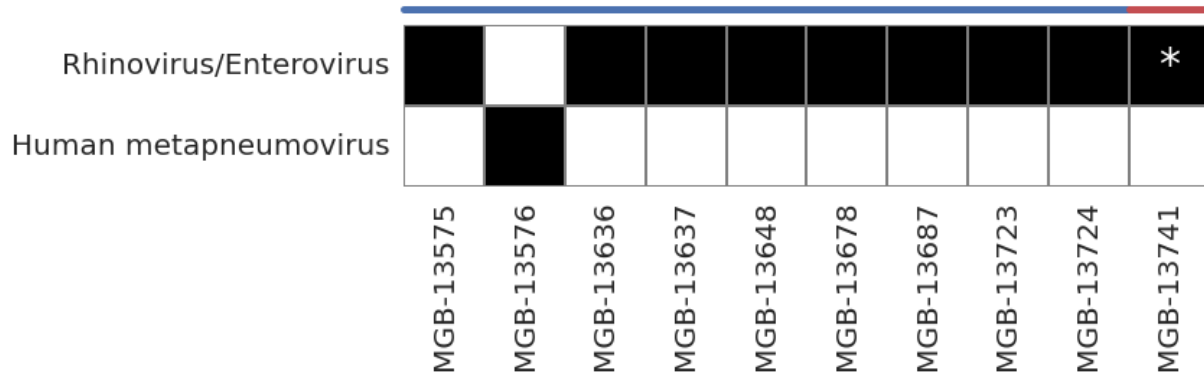

222

223 **Supplemental Figure S3: Coinfection analysis of unbiased sequencing reads.** Respiratory  
 224 viral co-infections detected in patient samples by Kraken2 and megablast (Methods). Line  
 225 indicates clinical testing with Xpert Xpress SARS-CoV-2/Flu/RSV (blue) or BioFire Respiratory  
 226 2.1 Panel (red). Star (\*) indicates a positive clinical test.

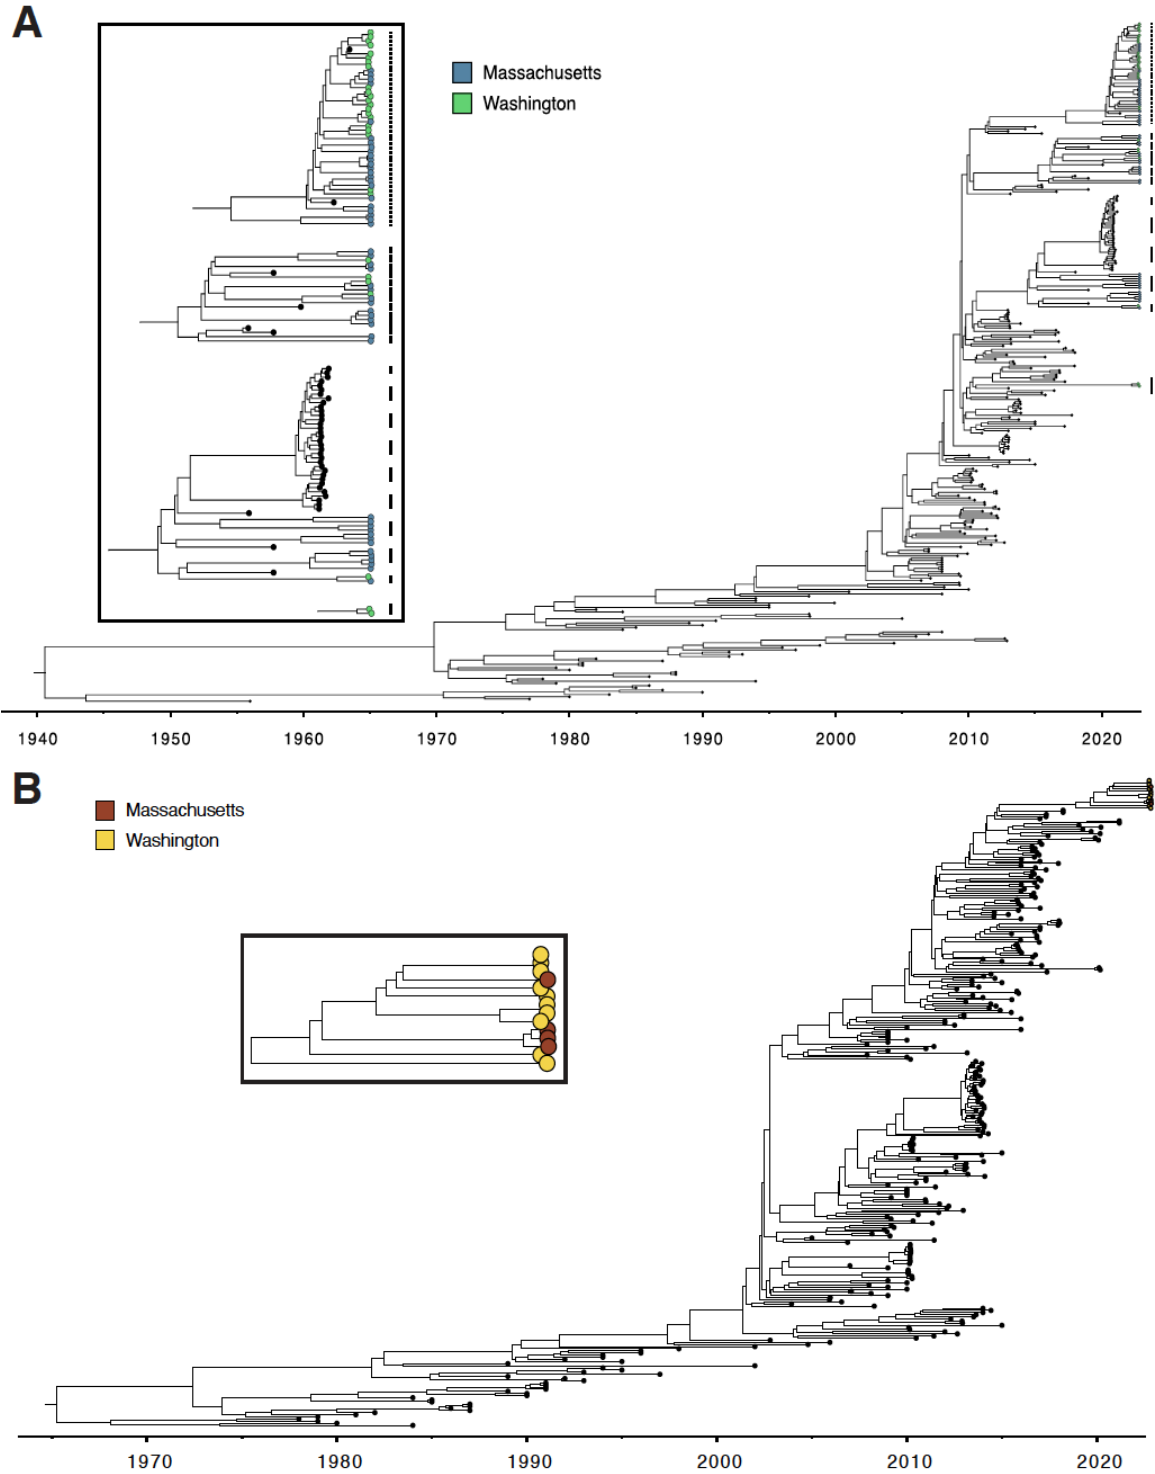

227

228 **Supplemental Figure S4: Bayesian phylogenetic trees.** A) Phylogenetic tree of a subset of  
 229 RSV-A genomes (N=304; MA tips in blue, WA tips in green, others in black). The inset displays  
 230 clades containing 2022 genomes with lines denoting their locations in the larger tree. B)  
 231 Phylogenetic tree of a subset of RSV-B genomes (N=304; MA tips in red, WA tips in yellow,  
 232 others in black). The inset displays the clade containing 2022 genomes with a line denoting its  
 233 location in the larger tree.

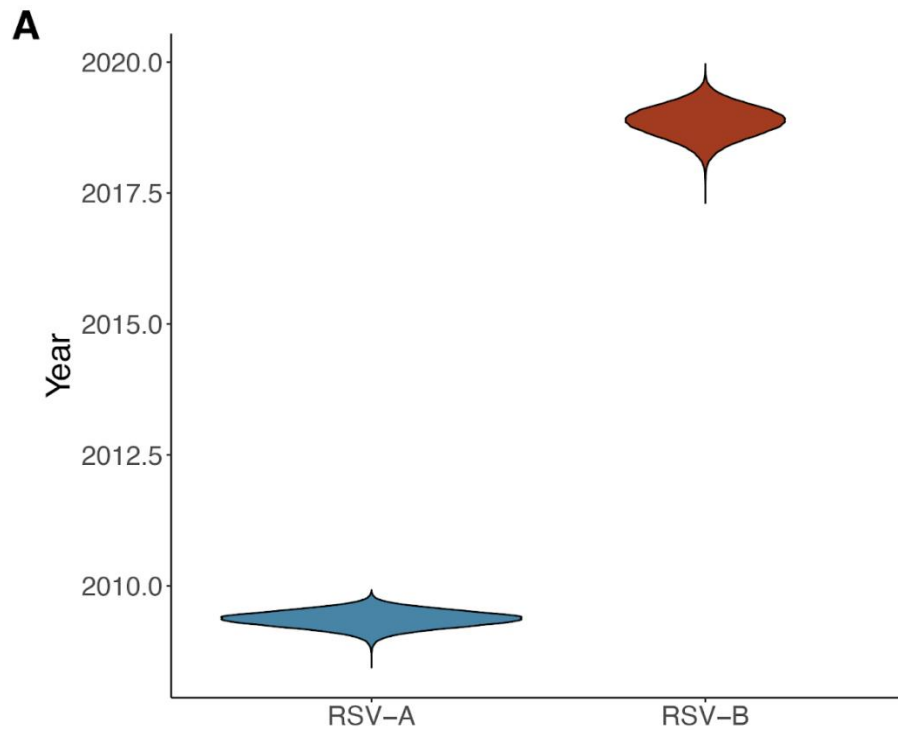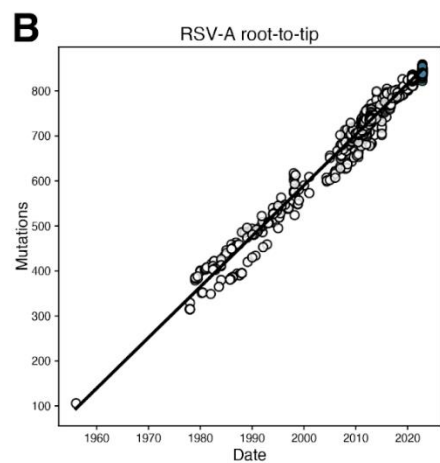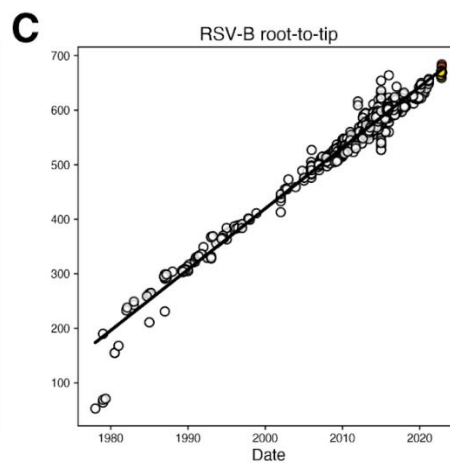

234

235 **Supplemental Figure S5: Molecular dating of the 2022 RSV samples.** A) Posterior  
 236 distribution of the tMRCA for RSV-A (95% highest posterior density interval in blue, 2009-02 –  
 237 2009-08). Posterior distribution of the tMRCA for RSV-B (95% highest posterior density interval  
 238 in red, 2018-03 – 2019-05). B) Root-to-tip mutation counts vs. sample collection date for RSV-A.  
 239 MA tips in blue, WA tips in green. C) Root-to-tip mutation counts vs. sample collection date for  
 240 RSV-B. MA tips in red, WA tips in yellow.

241 **Supplemental Table S1A. MGH sample demographics.**

|                                          | <b>All<br/>Patients<br/>(N = 950)</b> | <b>Inpatient<br/>(N = 212)</b> | <b>Outpatient<br/>(N = 286)</b> | <b>Emergency<br/>Department<br/>(N = 452)</b> |
|------------------------------------------|---------------------------------------|--------------------------------|---------------------------------|-----------------------------------------------|
| <b>Baseline Demographics</b>             |                                       |                                |                                 |                                               |
| Median age (IQR) - yr                    | 2 (0-5)                               | 2 (1-5)                        | 2 (0-6)                         | 2 (0-4.3)                                     |
| Male - no. (%)                           | 507 (53.4)                            | 100<br>(47.2)                  | 162 (56.6)                      | 244 (54.0)                                    |
| <b>Reported Symptoms</b>                 |                                       |                                |                                 |                                               |
| Symptomatic - no. (%)                    | 950 (100)                             | 212 (100)                      | 286 (100)                       | 452 (100)                                     |
| Cough - no. (%)                          | 719 (75.7)                            | 168<br>(79.2)                  | 229 (80.1)                      | 322 (71.2)                                    |
| Fever - no. (%)                          | 507 (53.4)                            | 135<br>(63.7)                  | 142 (49.7)                      | 230 (50.9)                                    |
| Sore Throat - no. (%)                    | 90 (9.5)                              | 21 (9.9)                       | 23 (8.0)                        | 46 (10.2)                                     |
| Nasal Congestion/Runny Nose -<br>no. (%) | 361 (38.0)                            | 92 (43.4)                      | 149 (52.1)                      | 120 (26.5)                                    |
| Shortness of Breath - no. (%)            | 199 (20.9)                            | 24 (11.3)                      | 24 (8.4)                        | 151 (33.4)                                    |
| Loss of Smell or Taste - no. (%)         | 4 (0.4)                               | 0 (0)                          | 1 (0.3)                         | 3 (0.7)                                       |
| Muscle Aches - no. (%)                   | 28 (2.9)                              | 7 (3.3)                        | 13 (4.5)                        | 9 (2.0)                                       |

242 **Supplemental Table S1B. Sequenced cohort demographics.**

|                                       | <b>All Patients<br/>(N = 77)</b> | <b>Inpatient<br/>(N = 14)</b> | <b>Outpatient<br/>(N = 33)</b> | <b>Emergency Department<br/>(N = 30)</b> |
|---------------------------------------|----------------------------------|-------------------------------|--------------------------------|------------------------------------------|
| <b>Baseline Demographics</b>          |                                  |                               |                                |                                          |
| Median age (IQR) - yr                 | 2 (0-4)                          | 1.5 (0.3-5.5)                 | 1 (0-3)                        | 2 (0.3-15.5)                             |
| Male - no. (%)                        | 34 (44.2)                        | 5 (35.7)                      | 15 (45.5)                      | 14 (46.7)                                |
| <b>Reported Symptoms</b>              |                                  |                               |                                |                                          |
| Symptomatic - no. (%)                 | 77 (100)                         | 14 (100)                      | 33 (100)                       | 30 (100)                                 |
| Cough - no. (%)                       | 62 (80.5)                        | 9 (64.3)                      | 28 (84.8)                      | 25 (83.3)                                |
| Fever - no. (%)                       | 43 (55.8)                        | 9 (64.3)                      | 17 (51.5)                      | 17 (56.7)                                |
| Sore Throat - no. (%)                 | 11 (14.3)                        | 1 (7.1)                       | 3 (9.1)                        | 7 (23.3)                                 |
| Nasal Congestion/Runny Nose - no. (%) | 37 (48.1)                        | 9 (64.3)                      | 19 (57.6)                      | 9 (30.0)                                 |
| Shortness of Breath - no. (%)         | 15 (19.5)                        | 0 (0)                         | 4 (12.1)                       | 11 (36.7)                                |
| Loss of Smell or Taste - no. (%)      | 0 (0)                            | 0 (0)                         | 0 (0)                          | 0 (0)                                    |
| Muscle Aches - no. (%)                | 3 (3.9)                          | 0 (0)                         | 2 (6.1)                        | 1 (3.3)                                  |
| <b>RSV Strain</b>                     |                                  |                               |                                |                                          |
| RSV-A - no. (%)                       | 70 (90.9)                        | 13 (92.9)                     | 28 (84.8)                      | 29 (96.7)                                |
| RSV-B - no. (%)                       | 7 (9.1)                          | 1 (7.1)                       | 5 (15.2)                       | 1 (3.3)                                  |



243 **Supplemental Table S1C. Number of cases (MGH and sequenced cohorts) or**  
 244 **hospitalization rate per 100,000 (CDC) by sex. P-values calculated relative to the CDC data**  
 245 **using the chi-square test.**

|                                    | Female | Male | P-Value |
|------------------------------------|--------|------|---------|
| CDC (Hospitalizations per 100,000) | 24.8   | 27.1 | -----   |
| MGH                                | 444    | 506  | 0.09    |
| MGH (Inpatient)                    | 112    | 100  | 0.78    |
| MGH (Sequenced)                    | 43     | 34   | 0.44    |

247 **Supplemental References**

- 248 1. RSV-NET interactive dashboard [Internet]. 2022 [cited 2022 Dec 8];Available from:  
249 <https://www.cdc.gov/rsv/research/rsv-net/dashboard.html>
- 250 2. Eden J-S, Sikazwe C, Xie R, et al. Off-season RSV epidemics in Australia after easing of  
251 COVID-19 restrictions. *Nat Commun* 2022;13(1):2884.
- 252 3. Laham FR, Mansbach JM, Piedra PA, et al. Clinical Profiles of Respiratory Syncytial Virus  
253 Subtypes A AND B Among Children Hospitalized with Bronchiolitis. *Pediatr Infect Dis J*  
254 2017;36(8):808–10.
- 255 4. Shi T, McAllister DA, O'Brien KL, et al. Global, regional, and national disease burden  
256 estimates of acute lower respiratory infections due to respiratory syncytial virus in young  
257 children in 2015: a systematic review and modelling study. *Lancet* 2017;390(10098):946–58.
- 258 5. Hornsleth A, Klug B, Nir M, et al. Severity of respiratory syncytial virus disease related to  
259 type and genotype of virus and to cytokine values in nasopharyngeal secretions. *Pediatr*  
260 *Infect Dis J* 1998;17(12):1114–21.
- 261 6. Ruzin A, Pastula ST, Levin-Sparenberg E, et al. Characterization of circulating RSV strains  
262 among subjects in the OUTSMART-RSV surveillance program during the 2016-17 winter  
263 viral season in the United States. *PLoS One* 2018;13(7):e0200319.
- 264 7. Guide for considering influenza testing when influenza viruses are circulating in the  
265 community [Internet]. 2021 [cited 2023 Jan 10];Available from:  
266 <https://www.cdc.gov/flu/professionals/diagnosis/consider-influenza-testing.htm>
- 267 8. Hanson KE, Azar MM, Banerjee R, et al. Molecular Testing for Acute Respiratory Tract  
268 Infections: Clinical and Diagnostic Recommendations From the IDSA's Diagnostics  
269 Committee. *Clin Infect Dis* 2020;71(10):2744–51.
- 270 9. RSV National Trends [Internet]. 2022 [cited 2022 Dec 14];Available from:  
271 <https://www.cdc.gov/surveillance/nrevss/rsv/natl-trend.html>
- 272 10. United States Census Bureau [Internet]. [cited 2022 Dec 14];Available from:  
273 <https://www.census.gov/quickfacts/fact/table/US/PST045221>
- 274 11. Sanghavi SK, Bullotta A, Husain S, Rinaldo CR. Clinical evaluation of multiplex real-time  
275 PCR panels for rapid detection of respiratory viral infections. *J Med Virol* 2012;84(1):162–9.
- 276 12. Matranga CB, Andersen KG, Winnicki S, et al. Enhanced methods for unbiased deep  
277 sequencing of Lassa and Ebola RNA viruses from clinical and biological samples. *Genome*  
278 *Biol* 2014;15(11):519.
- 279 13. Park DJ, Dudas G, Wohl S, et al. Ebola Virus Epidemiology, Transmission, and Evolution  
280 during Seven Months in Sierra Leone. *Cell* 2015;161(7):1516–26.
- 281 14. Sagulenko P, Puller V, Neher RA. TreeTime: Maximum-likelihood phylodynamic analysis.  
282 *Virus Evol* 2018;4(1):vex042.

- 283 15. Huddleston J, Hadfield J, Sibley TR, et al. Augur: a bioinformatics toolkit for phylogenetic  
284 analyses of human pathogens. *J Open Source Softw* [Internet] 2021;6(57). Available from:  
285 <http://dx.doi.org/10.21105/joss.02906>
- 286 16. Hadfield J, Megill C, Bell SM, et al. Nextstrain: real-time tracking of pathogen evolution.  
287 *Bioinformatics* 2018;34(23):4121–3.
- 288 17. Dudas G. baltic: baltic - backronymed adaptable lightweight tree import code for molecular  
289 phylogeny manipulation, analysis and visualisation. Development is back on the  
290 [evogytis/baltic](https://github.com/evogytis/baltic) branch (i.e. here) [Internet]. Github; [cited 2022 Dec 9]. Available from:  
291 <https://github.com/evogytis/baltic>
- 292 18. Hunter. Matplotlib: A 2D Graphics Environment. 2007;9:90–5.
- 293 19. Suchard MA, Lemey P, Baele G, Ayres DL, Drummond AJ, Rambaut A. Bayesian  
294 phylogenetic and phylodynamic data integration using BEAST 1.10. *Virus Evol*  
295 2018;4(1):vey016.
- 296 20. Hasegawa M, Kishino H, Yano T. Dating of the human-ape splitting by a molecular clock of  
297 mitochondrial DNA. *J Mol Evol* 1985;22(2):160–74.
- 298 21. Yang Z. Maximum likelihood phylogenetic estimation from DNA sequences with variable  
299 rates over sites: approximate methods. *J Mol Evol* 1994;39(3):306–14.
- 300 22. Drummond AJ, Rambaut A, Shapiro B, Pybus OG. Bayesian coalescent inference of past  
301 population dynamics from molecular sequences. *Mol Biol Evol* 2005;22(5):1185–92.
- 302 23. Rambaut A, Drummond AJ, Xie D, Baele G, Suchard MA. Posterior Summarization in  
303 Bayesian Phylogenetics Using Tracer 1.7. *Syst Biol* 2018;67(5):901–4.
- 304 24. Drummond AJ, Rambaut A. BEAST: Bayesian evolutionary analysis by sampling trees.  
305 *BMC Evol Biol* 2007;7:214.
- 306 25. Rambaut A, Lam T, Carvalho L, Pybus O. Exploring the temporal structure of  
307 heterochronous sequences using TempEst (formerly Path-O-Gen). *Virus Evolution*  
308 2016;2(1).
- 309 26. Wood DE, Lu J, Langmead B. Improved metagenomic analysis with Kraken 2. *Genome Biol*  
310 2019;20(1):257.
- 311 27. Lemieux JE, Siddle KJ, Shaw BM, et al. Phylogenetic analysis of SARS-CoV-2 in Boston  
312 highlights the impact of superspreading events. *Science* [Internet] 2021;371(6529).  
313 Available from: <http://dx.doi.org/10.1126/science.abe3261>
